# Supplementary material
Source: Royal Society of Chemistry journal article supplement (doi:10.1039/d6nj01188h)
Supplement: d6nj01188h1.pdf [file d6nj01188h1.pdf]

## Supporting Information

### **Docosahexaenoic acid-copper (DHA-Cu) complex catalysis: UV- activated aerobic oxidation via experimental and computational approaches**

**Arunadevi Mani<sup>a</sup>, Janani Mullaivendhan <sup>a</sup>, Velmurugan Loganathan <sup>a</sup>, Idhayadhulla Akbar <sup>a,\*</sup>**

<sup>a</sup> Research Department of Chemistry, Nehru Memorial College (Affiliated to Bharathidasan University), Puthanampatti -621007, Tiruchirappalli District, Tamil Nadu, India.

Corresponding author E-mail: [a.idhayadhulla@gmail.com](mailto:a.idhayadhulla@gmail.com)

| <b>S. No</b> | <b>Contents</b>                                                                                                                 | <b>Page no.</b> |
|--------------|---------------------------------------------------------------------------------------------------------------------------------|-----------------|
|              | <b>Results and Discussion</b>                                                                                                   | <b>2-9</b>      |
| 1.           | The FT-IR spectra detailed explanation about absorption frequency and functional group presentation of the DHA-Cu complex       | 2               |
| 2.           | Proposed Photocatalytic Mechanism for DHA–Cu complex                                                                            | 3               |
| 3.           | The quantitative performance metrics such as turnover frequency (TOF), conversion yield, and selectivity, of the DHA-Cu complex | 4-5             |
| 4.           | The DHA-Cu complex <sup>1</sup> H, and <sup>13</sup> C NMR spectrum of benzaldehyde                                             | 5               |
| 5            | GC chromatogram (a) before aerobic oxidation benzylalchol (b) after aerobic oxidation of benzaldehyde using DHA-Cu complex      | 6               |
| 6            | The connection between IR and HOMO-LUMO value of the DHA–Cu complex                                                             | 7-8             |
| 7            | Reference                                                                                                                       | 9               |

## 1. The FT-IR spectra detailed explanation about absorption frequency and functional group presentation of the DHA-Cu complex

**Table 1.** The FT-IR spectra detailed explanation about absorption frequency and functional group presentation of the DHA-Cu complex

| Absorption frequency (cm <sup>-1</sup> )    | Functional group present           | Explanation                                                                       | References |
|---------------------------------------------|------------------------------------|-----------------------------------------------------------------------------------|------------|
| <b>DHA (Docosahexaenoic acid)</b>           |                                    |                                                                                   |            |
| 411.55, 449.38, and 502.59 cm <sup>-1</sup> | lower-frequency fingerprint region | distinct skeletal deformation and out-of-plane bending modes                      | 2          |
| 1041.81                                     | C–O stretching                     | C–O (from –COOH) bond stretch.                                                    | 3          |
| 1638.00                                     | C=C stretching                     | From cis-double bonds in the unsaturated hydrocarbon chain.                       | 4          |
| 3269.74                                     | O–H stretching (H-bonded)          | Broad O–H stretch from the carboxylic acid group, possibly hydrogen bonded.       | 5          |
| <b>DHA-Cu complex</b>                       |                                    |                                                                                   |            |
| 591.64                                      | Cu–O stretching vibrations         | Indicates interaction between Cu and oxygen atoms in DHA.                         | 1          |
| 797.98                                      | C=C bending                        | Suggests presence of cis-double bonds in the unsaturated chain of DHA.            | 4          |
| 864.37                                      | CH <sub>2</sub> rocking            | Supports the presence of aliphatic and unsaturated hydrocarbon chains in DHA.     | 6          |
| 1046.62                                     | C–O stretching                     | C–O bond stretch.                                                                 | 7          |
| 1638.00                                     | C=C stretching (alkene)            | Typical of unsaturated fatty acids; could be shifted due to coordination with Cu. | 4          |
| 3433.93                                     | O–H stretching (broad)             | Strongly hydrogen bonded OH, possibly affected by metal coordination or moisture. | 8          |

## 2. Proposed Photocatalytic Mechanism for DHA–Cu complex

### 2.1. Proposed Photocatalytic Mechanism for DHA–Cu complex

The proposed mechanism involving reactive oxygen species is based on previously reported photocatalytic oxidation pathways of copper complexes and represents a plausible reaction pathway.

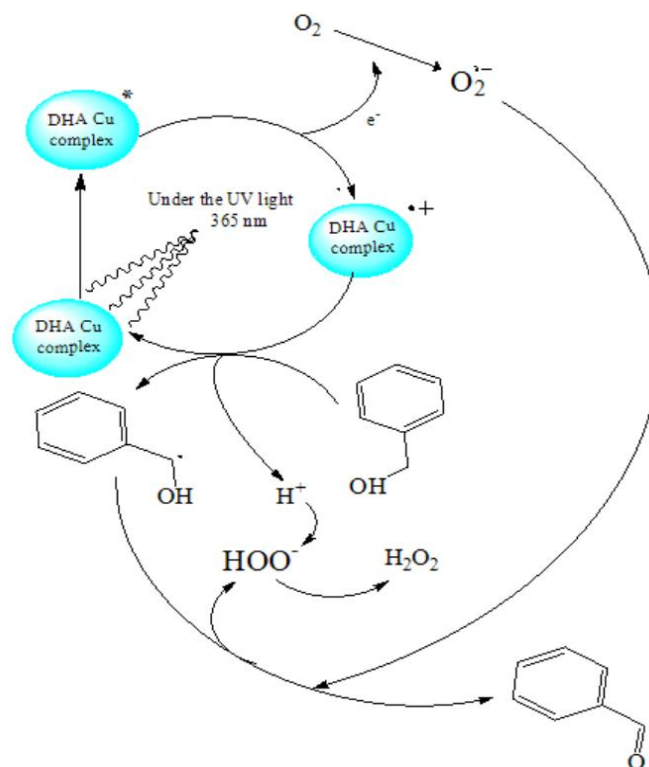

**Scheme 1:** Proposed possible Photocatalytic Mechanism for DHA–Cu complex

DHA-Cu complex under the UV-light irradiation, the DHA-Cu complex becomes excited and changes to an excited state. In this excited state, the DHA-Cu complex accepts an electron from benzyl alcohol and return to its normal ground state. Due to this electron transfer, benzyl alcohol forms a benzyl radical along with the release of  $H^+$  ions. At the same time, the  $O_2$  present in the reaction medium accepts an electron form ( $\cdot O_2^-$ ). These superoxide radicals react with  $H^+$  ions to produce ( $\cdot OOH$ ). Further, the benzyl radical loses another hydrogen ion and gets converted into benzaldehyde and  $H_2O_2$ . The formation of these free radicals confirmed by EPR measurements using DMPO as a spin-trapping reagent and the conversion of benzyl alcohol to benzaldehyde was confirmed by GC analysis. Possible mechanism for photocatalytic oxidation of benzyl alcohol converted into benzaldehyde using the DHA-Cu complex under UV-light is shown in scheme 1.

### 3. The quantitative performance metrics such as turnover frequency (TOF), conversion yield, and selectivity, of the DHA-Cu complex

The conversion yield of benzyl alcohol and the selectivity of each product were determined from the gas chromatography (GC) results<sup>10</sup> (NMR Fig. 1. (a-b)) as follows:

### 3.1. Conversion of Benzyl Alcohol (%)

$$\text{Conversion (\%)} = \frac{\text{Initial peak area of benzyl alcohol} - \text{Remaining peak area}}{\text{Initial peak area of benzyl alcohol}} \times 100$$

Initial peak area = Benzyl alcohol + Benzaldehyde = 21.64 + 28.97 = 50.61

Remaining benzyl alcohol = 21.64

$$\text{Conversion (\%)} = \frac{50.61 - 21.64}{50.61} \times 100$$

Conversion = 57.3%

### 3.2. Selectivity toward Benzaldehyde (%)

$$\text{Selectivity (\%)} = \frac{\text{Peak area of benzaldehyde}}{\text{Total product formed}} \times 100$$

Product formed = total benzyl alcohol converted = 50.61 - 21.64 = 28.97

Benzaldehyde = 28.97

$$\text{Selectivity (\%)} = \frac{28.97}{28.97} \times 100$$

Selectivity (%) = 100%

### 3.3. Turnover Frequency (TOF)

$$\text{TOF} = \frac{\text{Moles of product formed}}{\text{Moles of catalyst} \times \text{reaction time}}$$

$$\text{TOF} = \frac{0.0573}{0.01 \times 15 \text{ (min)}}$$

TOF = 0.382 min<sup>-1</sup>

The TOF seems lower because the conversion is only 57% after 15 min. The catalytic performance was evaluated using the oxidation of Benzyl alcohol as a model reaction. The reaction showed 80% conversion with 94% selectivity toward Benzaldehyde after 1 h of UV irradiation. The calculated TOF was 75 h<sup>-1</sup>, demonstrating efficient catalytic activity. The catalyst also exhibited good recyclability over multiple reaction cycles.

#### 4. The DHA-Cu complex $^1\text{H}$ , and $^{13}\text{C}$ NMR spectrum of benzaldehyde

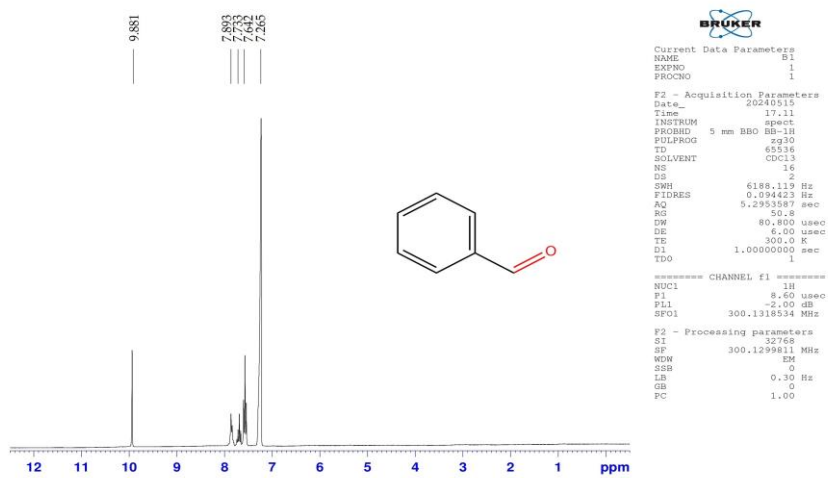

(a)  $^1\text{H}$  NMR

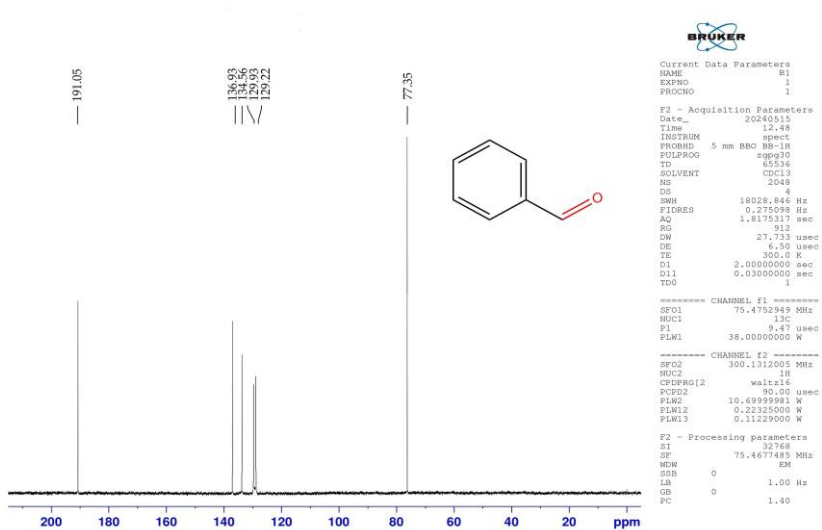

(b)  $^{13}\text{C}$  NMR

Fig. 1. NMR spectrum by benzaldehyde

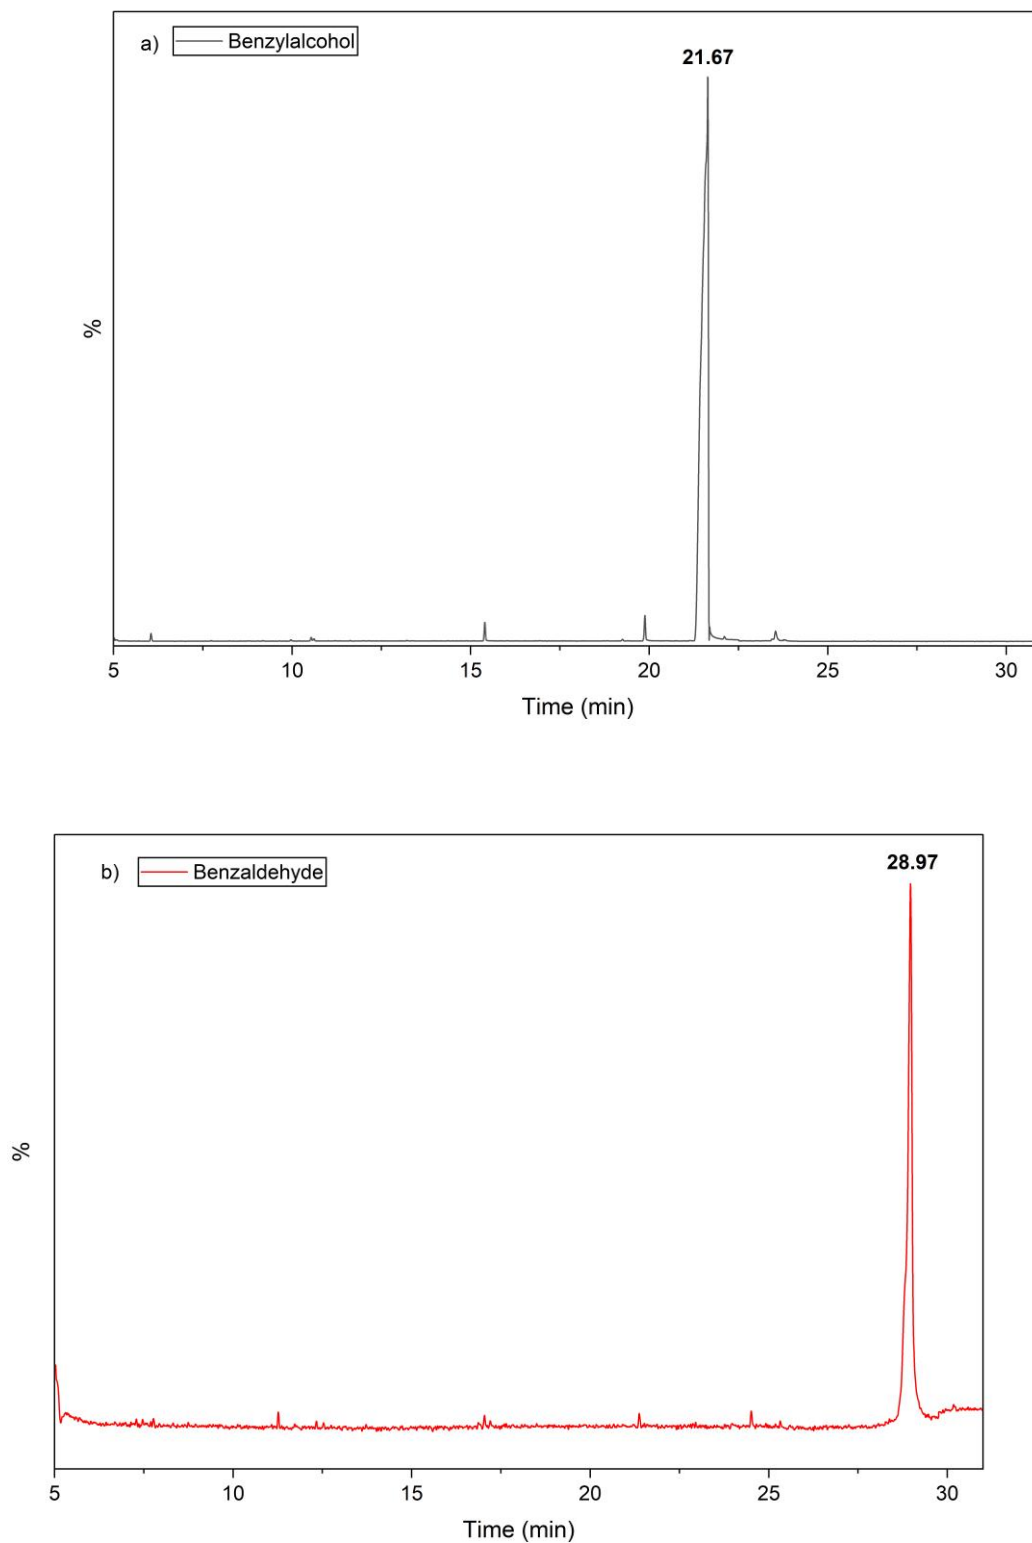

**Fig. 2.** GC chromatogram (a) before aerobic oxidation benzylalcohol (b) after aerobic oxidation of benzaldehyde using DHA-Cu complex

## 5. The connection between IR and HOMO-LUMO value of the DHA–Cu complex

| IR Peak                  | Possible Bond                          | Bond Reason                                                                                           | DFT Connection                                                                                                                                                                                            |
|--------------------------|----------------------------------------|-------------------------------------------------------------------------------------------------------|-----------------------------------------------------------------------------------------------------------------------------------------------------------------------------------------------------------|
| 591.64 cm <sup>-1</sup>  | Cu–O stretching<br>(metal–ligand bond) | Formation of Cu–O bond changes the local electron density, reflecting in the low-frequency IR region. | Low HOMO (–0.21) means electrons are slightly bound, allowing Cu <sup>2+</sup> to interact with lone pairs on oxygen. Soft molecule (s = 22.2) allows this bond to form easily, altering the IR spectrum. |
| 797.98 cm <sup>-1</sup>  | Metal–ligand vibrations                | Slight red/blue shift reflects metal coordination environment changes (Cu).                           | HOMO–LUMO gap (0.09 eV) allows fast charge redistribution upon metal interaction → shifts vibrational energy. Reflects soft-soft interaction: polarizable groups interacting with metal centers.          |
| 864.37 cm <sup>-1</sup>  | Out-of-plane bending M–O interaction   | Minimal shift due to stable C–H framework but affected by nearby Cu.                                  | Ionization energy (0.21 eV) means moderate ability to lose electrons → Cu can alter π-clouds slightly. Local dipole change shows up in IR bending modes.                                                  |
| 1041.81 cm <sup>-1</sup> | C–O stretching                         | Coordination with carbon–oxygen bond electron density.                                                | Chemical potential (μ = –0.17) indicates electron flow from DHA to metal centers. Softness allows electron sharing → altered bond stiffness shifted to the IR peak.                                       |

|                          |                                         |                                                                              |                                                                                                                                                                                         |
|--------------------------|-----------------------------------------|------------------------------------------------------------------------------|-----------------------------------------------------------------------------------------------------------------------------------------------------------------------------------------|
| 1384.50 cm <sup>-1</sup> | Symmetric stretching – CH <sub>3</sub>  | Metal coordination changes the vibration energy of CH <sub>3</sub> groups.   | Electron affinity (0.12) of the system shows the molecule easily accepts small charge perturbations.<br>CuO possibly increases electron withdrawal → blue shift observed (1384 → 1397). |
| 1621.35 cm <sup>-1</sup> | C=C stretching (conjugated system)      | These are core π-system vibrations and are sensitive to conjugation changes. | ΔE = 0.09 eV indicates high π-electron mobility → C=C, Cu interaction.<br>Electrophilicity (0.32) favors π-back bonding or delocalization, stabilizing structure.                       |
| 3435.93 cm <sup>-1</sup> | O–H stretching (hydroxyl groups in DHA) | Extending and slight shift due to hydrogen bonding and metal interaction.    | Soft molecule + polar groups = flexible hydrogen bonding<br>Electronegativity (χ = -0.17) suggests electron-donating groups are available for bonding, changing OH stretch.             |

## 6. Reference

1. A. S. Pujar, A. B. Kulkarni, S. N. Mathad, C. S. Hiremath, M. K. Rendale, M. R. Patil, R. B. Pujar, *Int. J. Self-Propag. High-Temp. Synth.*, 2018, **27**, 174-179.
2. B. Behera, K. Takahashi, Y. P. Lee, *PPCP.*, 2022, **24**, 18568-18581.
3. O. A. B. Pires, R. T. Alarcon, C. Gaglieri, L. C. da Silva-Filho, G. Bannach, *J. Therm. Anal. Cal.*, 2019, **137**, 171-173.
4. T. Rihayat, A. E. Hadi, N. Aidy, A. Safitri, J. P. Siregar, T. Cionita, D. F. Fitriyana, *Polym.*, 2021, **13**, 4019.
5. S. Kumari, Sunaina, S. Devi, M. Jha, *Energ & Fuels.*, 2025, **39**, 6426-6437.
6. A. E. Lewandowska, N. H. Inai, O. R. Ghita, S. J. Eichhorn, *RSC adv.*, 2018, **8**, 35831-35839.
7. P. T. Shoko, E. W. Blanch, P. J. Torley, C. Pillidge, *J. Raman Spectrosc.*, 2024, **55**, 1146-1155.
8. W. S. Kang, S. W. Choi, H. S. Kim, J. H. Kim, J. H. Lee, *J. anal. sci. Technol.*, 2024, **15**, 34.
